# Supplementary material
Source: publisher figshare collection journal article supplement (https://tandf.figshare.com/ndownloader/files/12558632)
Supplement: Supplementary file 1 [file 12558632]

**Supplementary Table 3.** Structure of endophyte communities as a function of hosts and geographic regions in Arizona. Geographic regions are defined as four broad areas of the state: N, north; C, central; SE, southeast; SW, southwest.

1. PERMANOVA

| Factors | Groups | R2  (Jaccard) | P value+ | R2  (Morisita-Horn) | P value+ |
| --- | --- | --- | --- | --- | --- |
| Host | Lichen and moss vs. vascular plant | 0.0208 | **0.001*** | 0.0391 | **0.001*** |
| Area | N, C, SE, SW | 0.0282 | **0.001*** | 0.0404 | **0.001*** |

1. ANOSIM

| Factors | Groups | R  (Jaccard) | P value+ | R  (Morisita-Horn) | P value+ |
| --- | --- | --- | --- | --- | --- |
| Host | Lichen and moss vs. vascular plant | 0.0611 | **0.019*** | 0.0632 | **0.018*** |
| Area | N, C, SE, SW | 0.0955 | **0.002*** | 0.0939 | **0.002*** |

+P value is adjusted by the BH method in R to control the false discovery rate.
